# Supplementary material for: Preparation and characterization of a novel thermosensitive nanoparticle for drug delivery in combined hyperthermia and chemotherapy
Source: Royal Society of Chemistry journal article supplement (doi:10.1039/c3tb20772b), 2013-01-01
Supplement: c3tb20772b.pdf [file c3tb20772b.pdf]

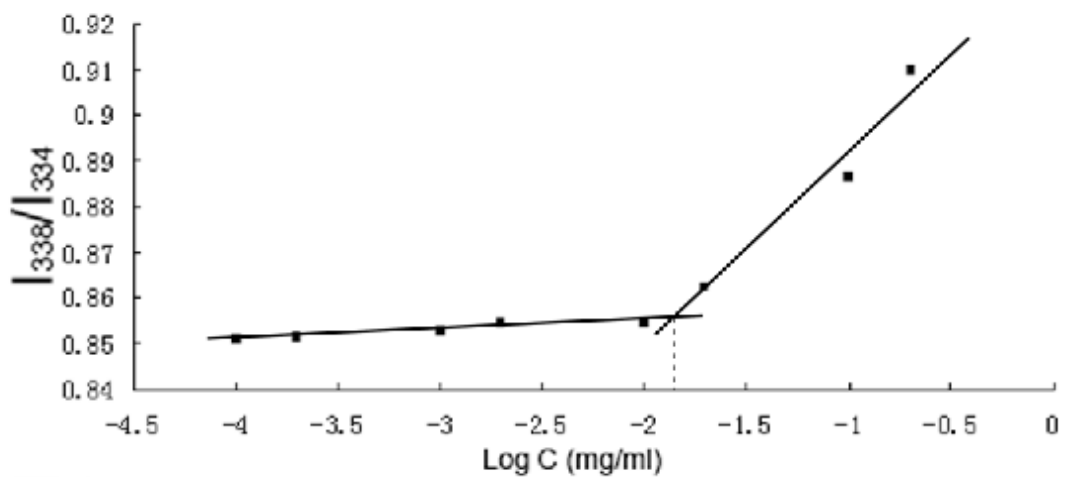

Fig. S1 Intensity ratio ( $I_{338}/I_{334}$ ) from pyrene excitation spectra as a function of polymer concentration in aqueous solution

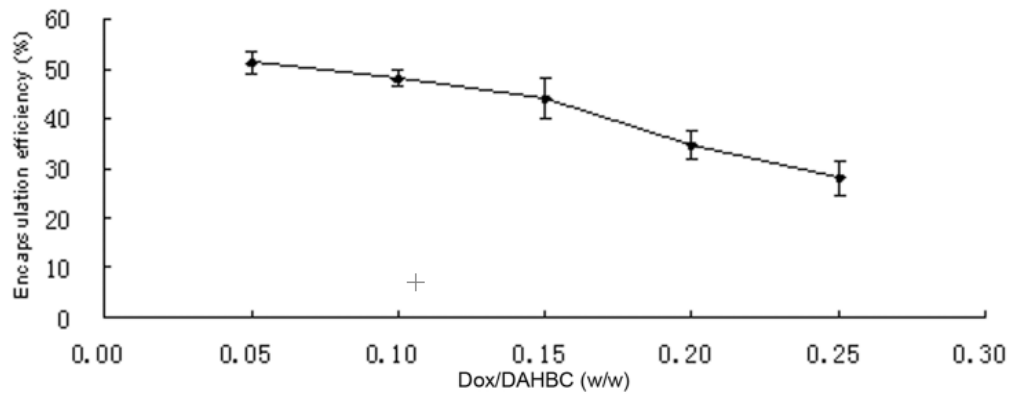

a

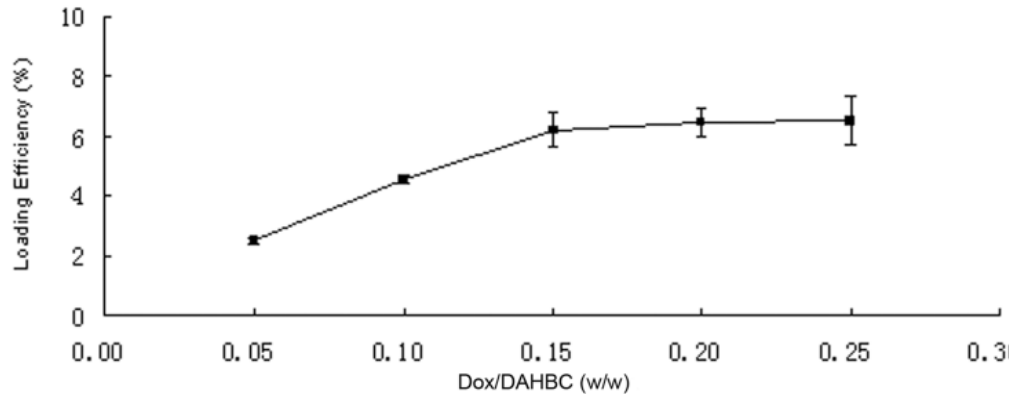

b

Fig. S2 (a) Encapsulation efficiency and (b) loading efficiency of DOX-loaded DAHBC nanoparticles

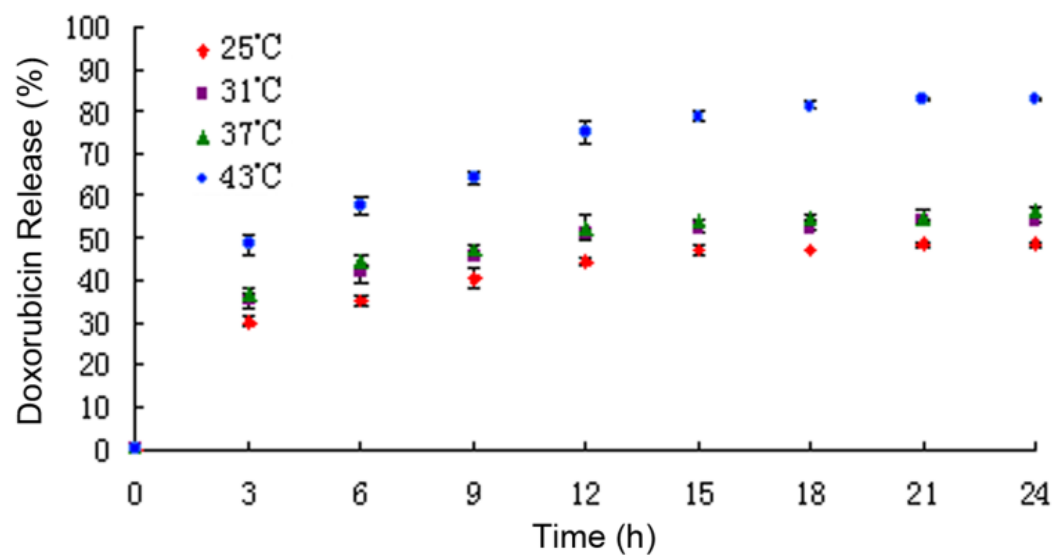

Fig. S3 Thermoresponsive release rate of DOX from DOX-loaded DAHBC nanoparticles
